# Supplementary material
Source: HighWire-hosted journal article supplement (http://mentalhealth.bmj.com/highwire/filestream/68270/field_highwire_adjunct_files/0/74109table2.pdf)
Supplement: 74109table2.pdf [file 74109table2.pdf]

Table 2 Meta-regression analysis of the Meta-18 and Meta-15 St John's Wort studies

| Characteristic                                          | Ratio of RR (95% CI) |                    |
|---------------------------------------------------------|----------------------|--------------------|
|                                                         | Meta-15              | Meta-18            |
| <i>Univariate analysis</i>                              |                      |                    |
| Decrease in sample size (unit increase in SE of log RR) | 11.9 (3.4 to 41.1)   | 14.0 (4.3 to 45.7) |
| Dose (<900 mg v >900 mg)                                | 0.9 (0.5 to 1.4)     | 0.8 (0.5 to 1.3)   |
| Language (German v English)                             | 0.7 (0.4 to 1.1)     | 0.6 (0.41 to 1.9)  |
| <i>Multivariate analysis</i>                            |                      |                    |
| Decrease in sample size (unit increase in SE of log RR) | 8.8 (2.1 to 36.4)    | 9.0 (2.4 to 34.1)  |
| Dose (<900 mg v >900 mg)                                | 0.9 (0.6 to 1.3)     | 0.9 (0.7 to 1.3)   |
| Language (German v English)                             | 0.9 (0.6 to 1.3)     | 0.8 (0.6 to 1.1)   |

SE, standard error; RR, relative risk.
